# Supplementary material for: Earth-Abundant Oxygen Evolution Catalysts Coupled onto ZnO Nanowire Arrays for Efficient Photoelectrochemical Water Cleavage
Source: PubMed Central journal article supplement (PMC4517101; doi:10.1002/chem.201403067), 2014-08-22
Supplement: chem0020-12954-sd1.pdf [file chem0020-12954-sd1.pdf]

# CHEMISTRY

## A **European** Journal

### Supporting Information

© Copyright Wiley-VCH Verlag GmbH & Co. KGaA, 69451 Weinheim, 2014

#### **Earth-Abundant Oxygen Evolution Catalysts Coupled onto ZnO Nanowire Arrays for Efficient Photoelectrochemical Water Cleavage**

Chaoran Jiang,<sup>[a]</sup> Savio J. A. Moniz,<sup>[a]</sup> Majeda Khraisheh,<sup>[b]</sup> and Junwang Tang\*<sup>[a]</sup>

chem\_201403067\_sm\_miscellaneous\_information.pdf

## Supporting Information

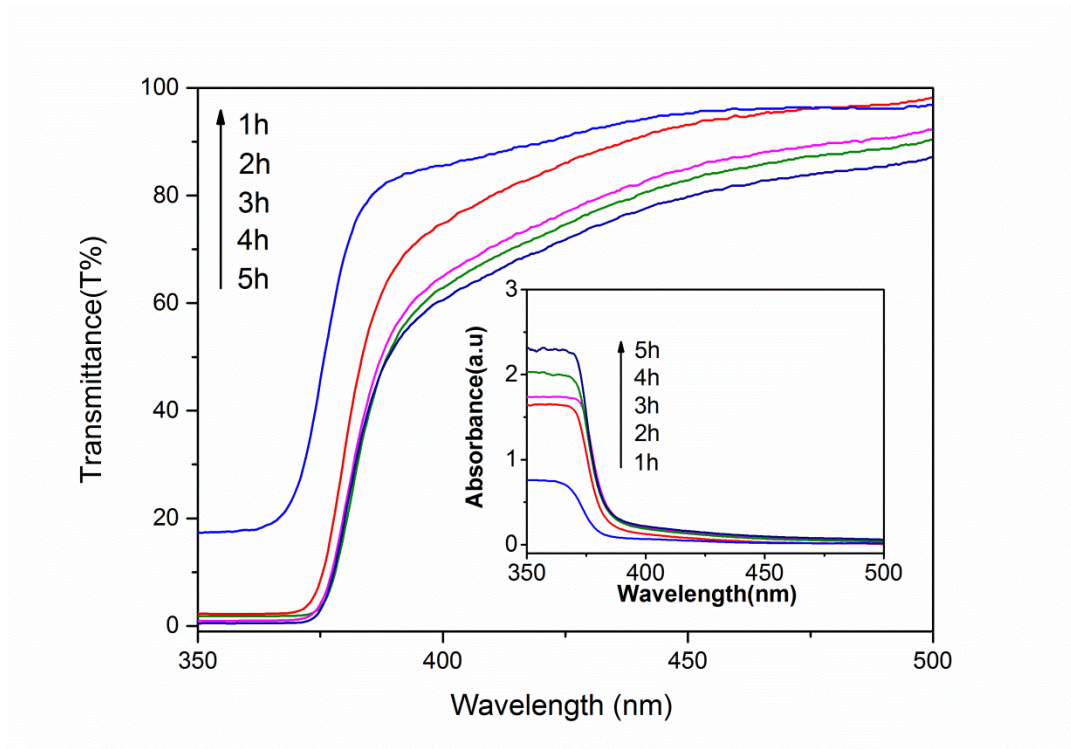

**Figure S1: UV-Vis transmittance spectra of ZnO nanowires grown at 90°C (0.025M precursor concentration) as a function of reaction time. (Insert shows the corresponding UV-Vis absorption spectra)**

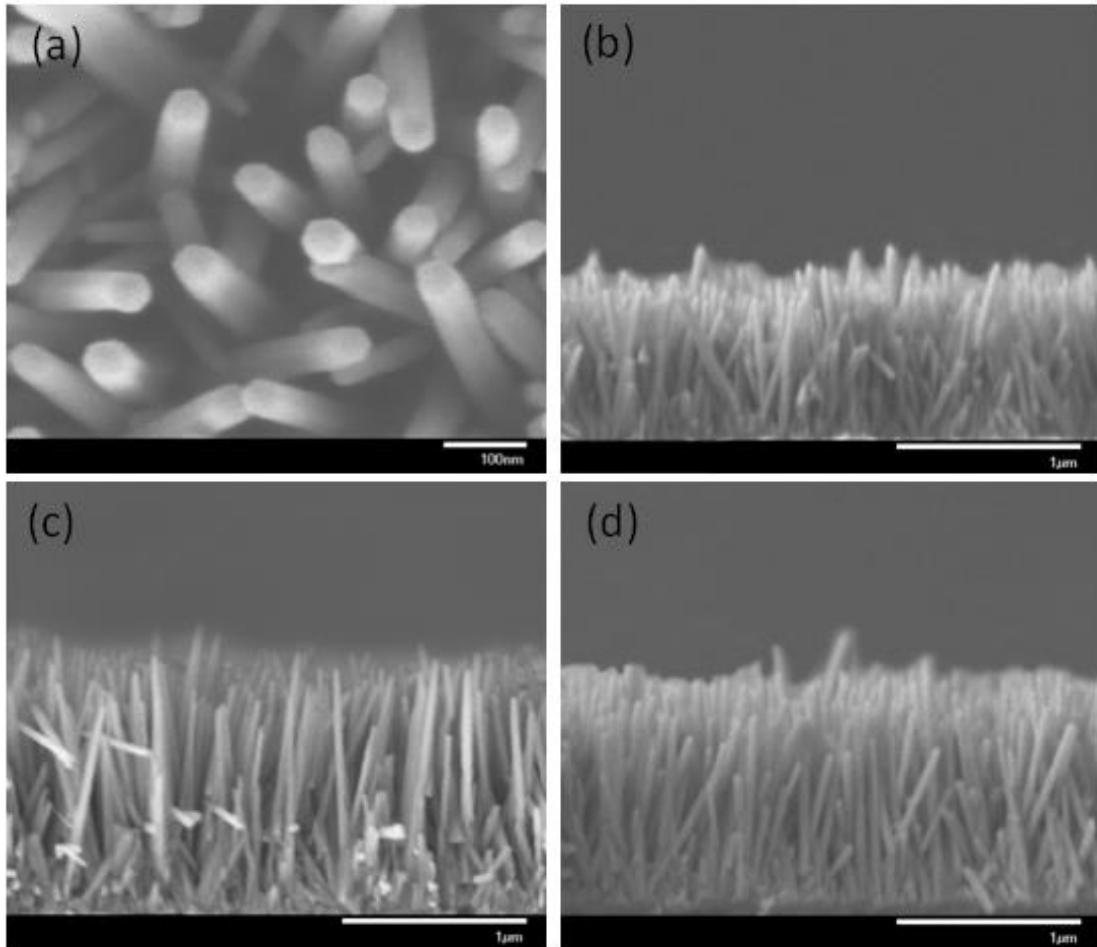

**Figure S2: SEM images of ZnO nanowire arrays grown by hydrolysis-condensation reaction with 0.025M precursor concentration at 90°C for different growth times (a) Top view of ZnO wires with reaction time of 4h; (b-d): Side-on view of 3h, 4h, 5h grown ZnO nanowires, respectively.**

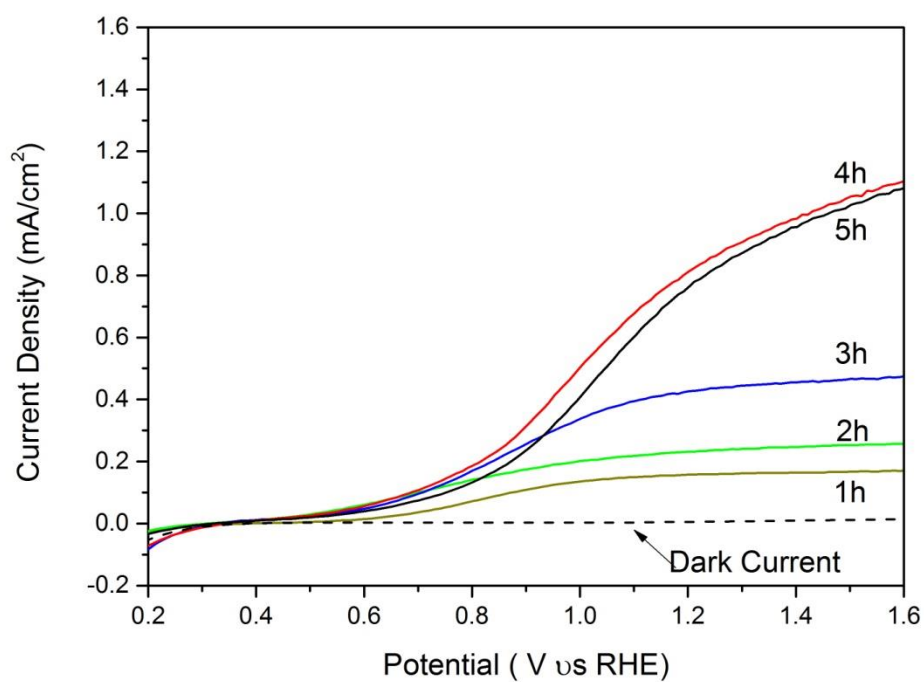

**Figure S3: I-V curves measured in a 0.2M Na<sub>2</sub>SO<sub>4</sub> solution with phosphate buffer (pH=7) for ZnO films prepared at 90°C with 0.025M precursor concentration for varying reaction time; Dark Scan was indicted by dashed line.**

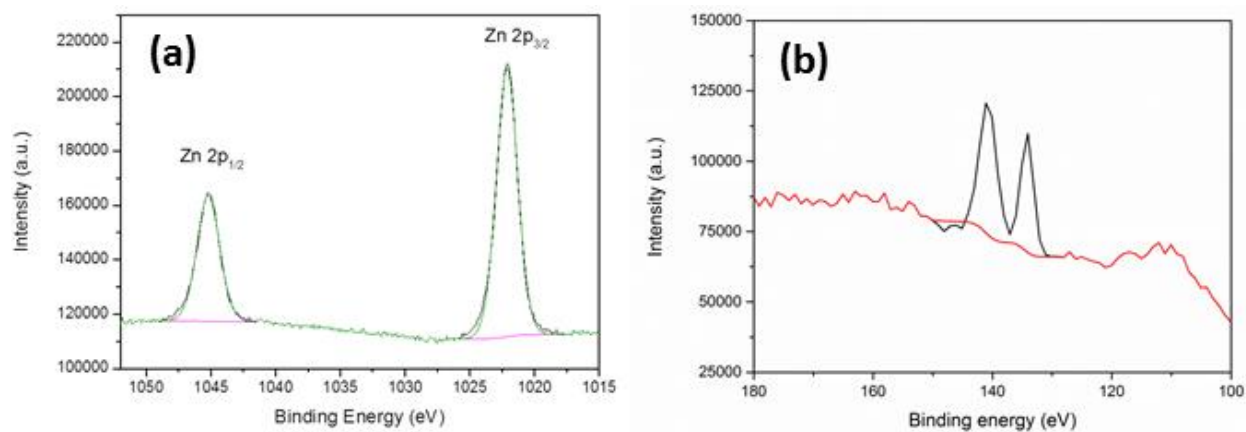

**Figure S4: (a) XPS spectrum of Zn 2p; (b) XPS spectrum of bare ZnO nanowires showing contribution from either Zn 3s and/or Sn 4s signals.**

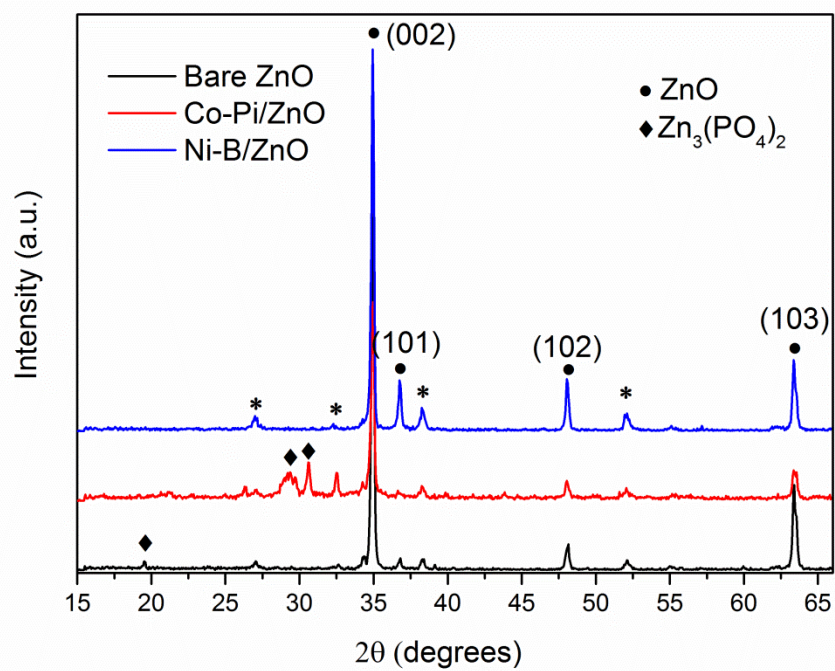

**Figure S5: XRD patterns of ZnO nanowire arrays after 1h PEC measurement, (\*) corresponds to the peak of SnO<sub>2</sub> (FTO substrate).**

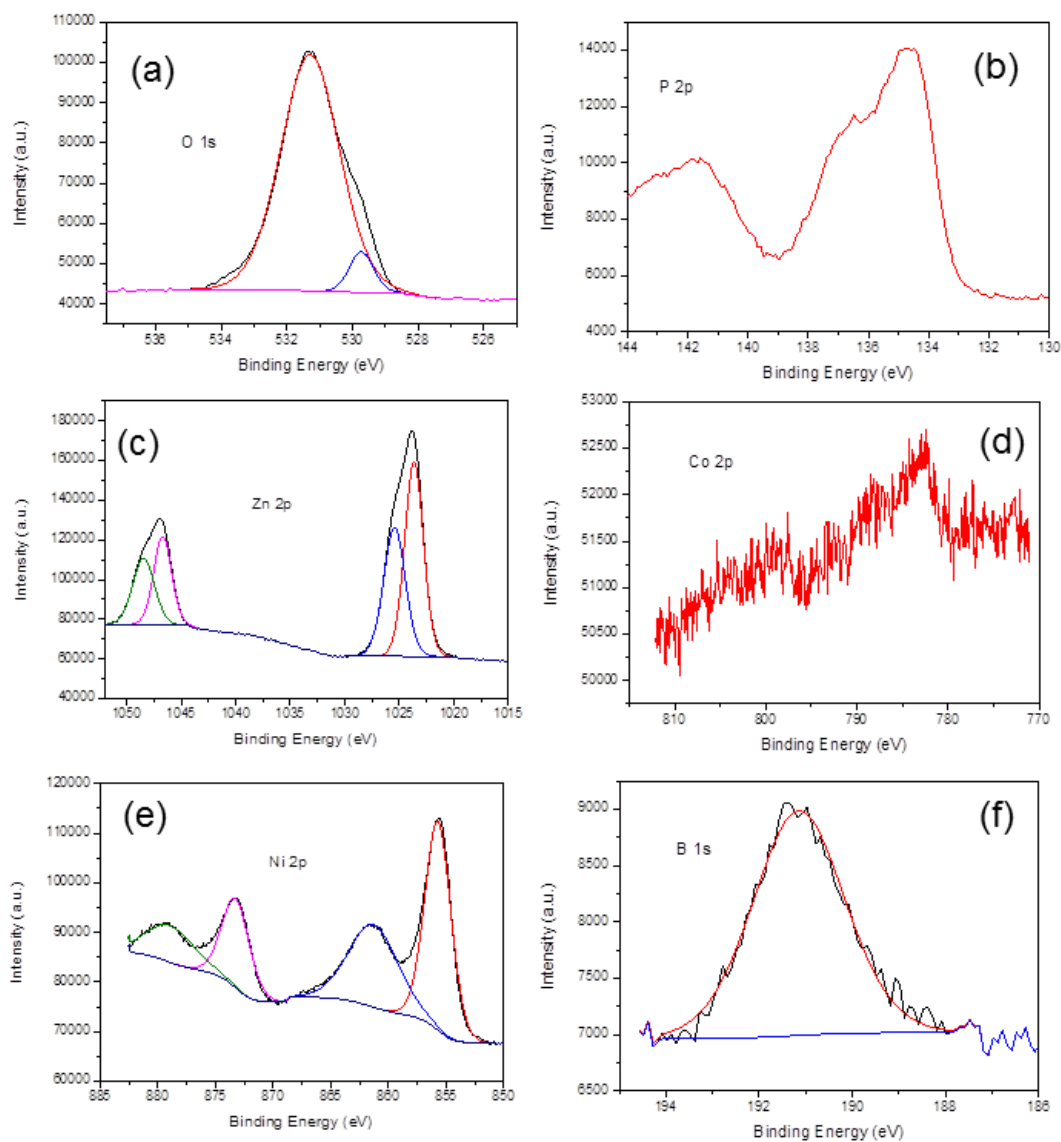

**Figure S6: XPS spectra of ZnO samples after PEC measurements: (a) O 1s and (b) P 2p regions of bare ZnO nanowires indicating additional  $\text{Zn}_3(\text{PO})_4$  formation, (c) Zn 2p and (d) Co 2p regions of Co-Pi/ZnO revealing distortion of Zn peaks and removal of cobalt species, (e) Ni 2p and (f) B 1s regions revealing no change in sample and excellent stability.**
